# Supplementary material for: Growth-Phase Sterigmatocystin Formation on Lactose Is Mediated via Low Specific Growth Rates in Aspergillus nidulans
Source: PubMed Central journal article supplement (PMC5198170; doi:10.3390/toxins8120354), 2016-11-28
Supplement: toxins-08-00354-s001.pdf [file toxins-08-00354-s001.pdf]

## Supplementary Materials: Growth-Phase Sterigmatocystin Formation on Lactose Is Mediated via Low Specific Growth Rates in *Aspergillus nidulans*

Zoltán Németh, Ákos P. Molnár, Balázs Fejes, Levente Novák, Levente Karaffa, Nancy P. Keller and Erzsébet Fekete

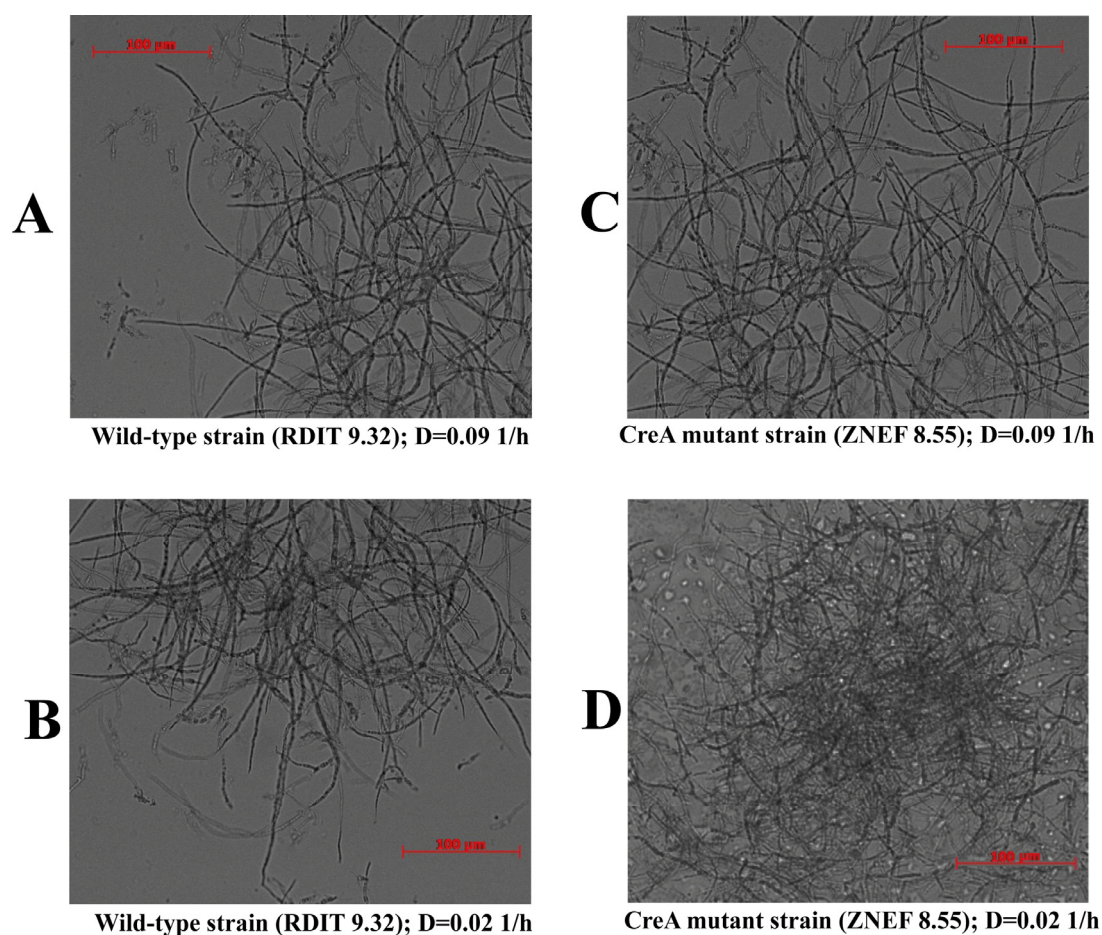

**Figure S1.** Representative light microscopic image of mycelia from the four chemostat-type continuous cultures analysed in this study.

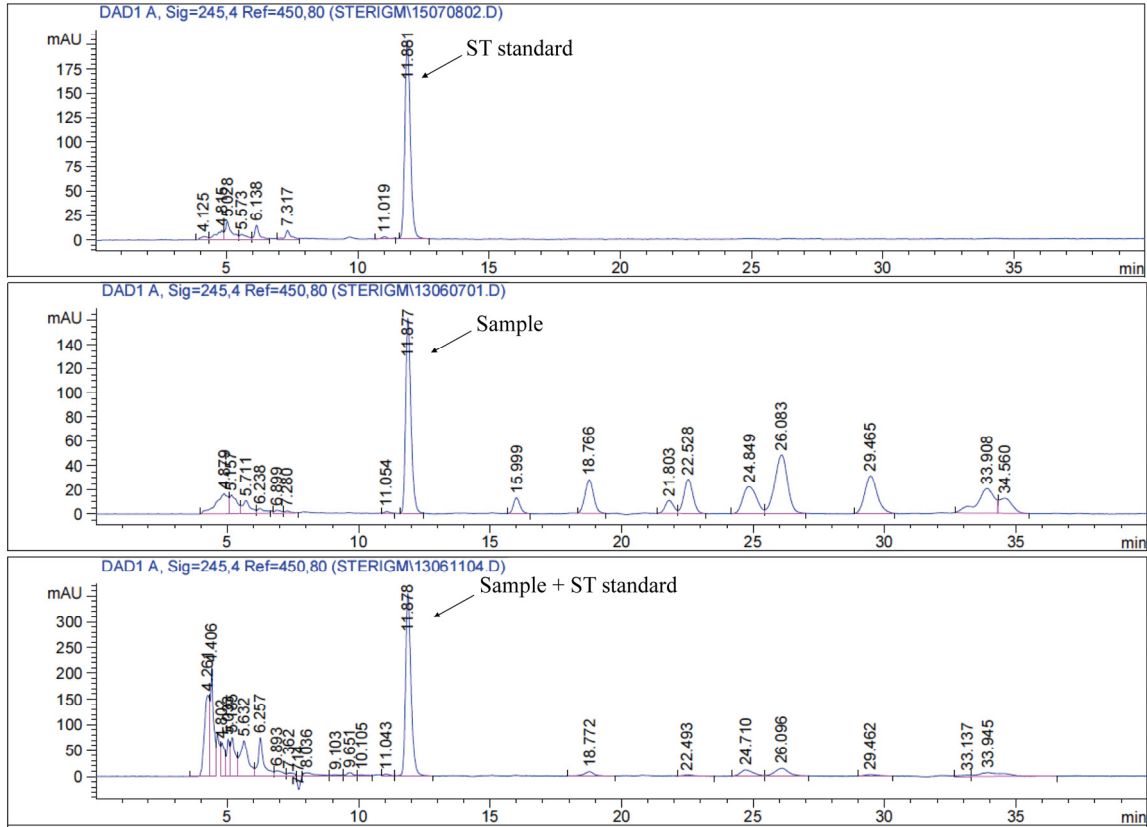

**Figure S2.** RP-HPLC-UV chromatograms showing an ST standard, a sample and a standard addition procedure.
